# Supplementary material for: Metabolic acclimation supports higher aluminium-induced secretion of citrate and malate in an aluminium-tolerant hybrid clone of Eucalyptus
Source: PubMed Central journal article supplement (PMC7789223; doi:10.1186/s12870-020-02788-4), 2021-01-06
Supplement: 12870_2020_2788_MOESM1_ESM.pdf [file 12870_2020_2788_MOESM1_ESM.pdf]

Title: Certification of superior varieties of forest tree

(*Eucalyptus grandis* × *Eucalyptus urophylla*).

# 林木良种证

(审 定)

良种名称 桉树广林巨尾桉 9 号

树种 巨尾桉

学名 *Eucalyptus grandis* × *Eucalyptus urophylla*

良种编号 桂 S-SC-EGU-023-2011

适宜推广生态区域

北纬 24° 以南, 海拔 500m 以下的轻霜或无霜区域, 酸性或微酸性土壤。

申请人 广西林业科学研究院

选育人 广西林业科学研究院

编号: (桂 SY) 第 023 号

发证机关

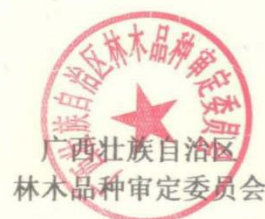

广西壮族自治区  
林木品种审定委员会

2011 年 12 月 31 日
