# Supplementary material for: Metabolic acclimation supports higher aluminium-induced secretion of citrate and malate in an aluminium-tolerant hybrid clone of Eucalyptus
Source: PubMed Central journal article supplement (PMC7789223; doi:10.1186/s12870-020-02788-4), 2021-01-06
Supplement: 12870_2020_2788_MOESM2_ESM.pdf [file 12870_2020_2788_MOESM2_ESM.pdf]

Title: Certification of superior varieties of forest tree  
(*Eucalyptus urophylla*).

# 林木良种证

(审 定)

良种名称 桉树广林尾叶桉 4 号

树种 尾叶桉

学名 *Eucalyptus urophylla*

良种编号 桂 S-SC-EU-022-2011

适宜推广生态区域

北纬 24° 以南，海拔 500m 以下的轻霜或无霜区域，酸性或微酸性土壤。

申请人 广西林业科学研究院

选育人 王以红、吴幼媚、蔡 玲、黄宏喜等

编号：(桂 SY) 第 022 号

发证机关

广西壮族自治区  
林木良种审定委员会

2011 年 12 月 31 日
